# Supplementary material for: Aberrant landscapes of maternal meiotic crossovers contribute to aneuploidies in human embryos
Source: HighWire-hosted journal article supplement (doi:10.1101/gr.278168.123), 2023-12-01

## Chromosome 16

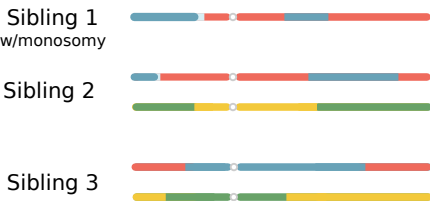

Initially we have no knowledge about the haplotypes composition

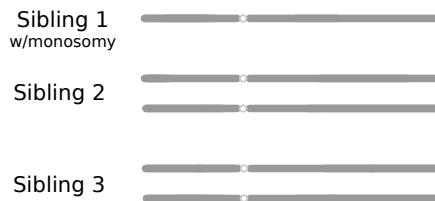

Our method identifies regions with matched haplotypes

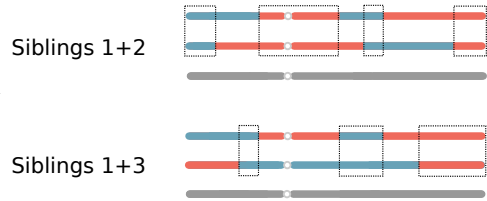

Common crossover positions are traced to the monosomy

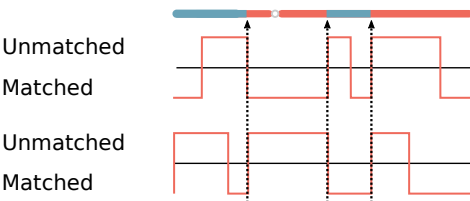

The output for siblings 1+2

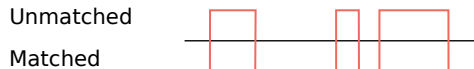

The output for siblings 1+3

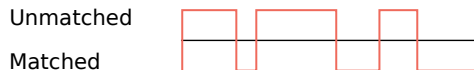

The output signal of our method

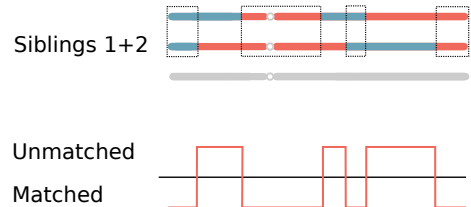

Supplement: Supplemental_CHASE.zip [file LD_CHASE.pdf › LD-CHASE-main/illustrations/LD_CHASE.pdf]
